# Supplementary material
Source: PubMed Central journal article supplement (PMC6383676)
Supplement: NIHMS1007020-supplement-Supplimental.pdf [file NIHMS1007020-supplement-Supplimental.pdf]

# Thiosulfate

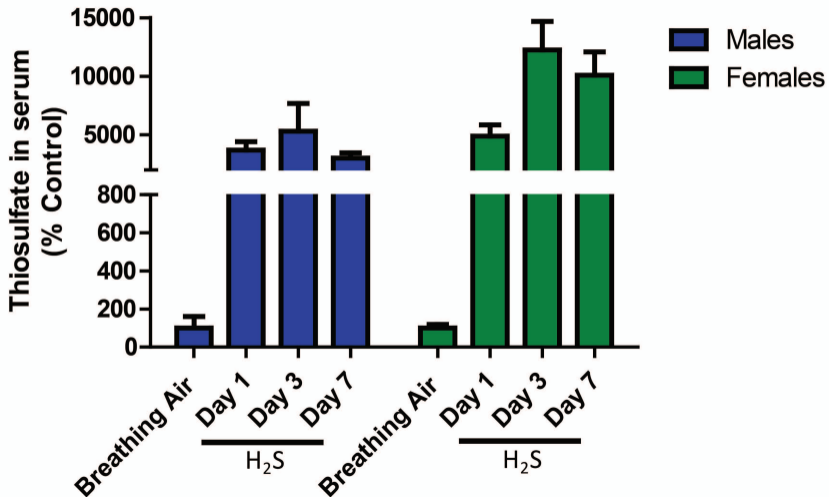

## Semi-Quantitative Grading Scheme for H<sub>2</sub>S-induced Neuropathology

| Score | Neurons:<br>Clumped Nissl<br>or central<br>chromatolysis | Neurons:<br>Angular,<br>shrunken<br>neurons or early<br>apoptotic<br>neurons | Neurons:<br>Loss of<br>neurons | Glia:<br>Astrocytes            | Glia:<br>Microglia/<br>macrophages | Apoptotic<br>bodies | Neuropil:<br>Pallor or<br>Vacuoles    |
|-------|----------------------------------------------------------|------------------------------------------------------------------------------|--------------------------------|--------------------------------|------------------------------------|---------------------|---------------------------------------|
| 0     | None                                                     | None                                                                         | No loss                        | Normal<br>morphology           | Normal<br>morphology               | None                | Solid, bright<br>eosinophilic         |
| 1     | Mild                                                     | <2/20X                                                                       |                                | Clumped<br>chromatin           |                                    | <2/20X              | Slightly pale<br>eosinophilic         |
| 2     |                                                          | 2-5/20X                                                                      |                                |                                | Rare amoeboid                      | 2-5/20X             | Finely<br>vacuolated                  |
| 3     | Moderate                                                 | 6-10/20X                                                                     | ~50% loss                      | Type II Alz<br>cells           | Many amoeboid                      | 6-10/20X            | Coarsely<br>vacuolated                |
| 4     |                                                          | 11-15/20X                                                                    |                                |                                | Mixed<br>amoeboid/Gitter           | 11-15/20X           | Condensation<br>of vacuoles           |
| 5     | Severe                                                   | >15/20X                                                                      | 100% loss                      | Loss of<br>astrocyte<br>pop'ns | Gitter cells<br>present            | >15/20X             | Loss of large<br>areas of<br>neuropil |

| Supplemental Table 1. Summary of functional observational battery evaluation during H <sub>2</sub> S |  |               |                  |
|------------------------------------------------------------------------------------------------------|--|---------------|------------------|
| Clinical effects in mice during H <sub>2</sub> S exposure                                            |  |               |                  |
|                                                                                                      |  | Breathing Air | H <sub>2</sub> S |
| <b>Autonomic</b>                                                                                     |  |               |                  |
| Lacrimation                                                                                          |  | No            | present          |
| Salivation                                                                                           |  | No            | present          |
| Urination/Defecation                                                                                 |  | Normal        | increased        |
| <b>Convulsions</b>                                                                                   |  |               |                  |
| Tonic movements                                                                                      |  | No            | mild             |
| Clonic movements                                                                                     |  | No            | severe           |
| Paddling feet                                                                                        |  | No            | severe           |
| <b>General Measures</b>                                                                              |  |               |                  |
| Piloerection                                                                                         |  | No            | present          |
| Body Posture                                                                                         |  | Normal        | hunched          |
| Dyspnea                                                                                              |  | No            | present          |
| <b>Gait</b>                                                                                          |  |               |                  |
| Hindlimbs splayed                                                                                    |  | No            | present          |
| Ataxia                                                                                               |  | No            | severe           |
| Unable to support weight                                                                             |  | No            | present          |

| Supplemental Table 3.<br>Neurochemical changes in various<br>brain regions |        |        | Breathing Air |        | H2S     |          |        |         |        |          |
|----------------------------------------------------------------------------|--------|--------|---------------|--------|---------|----------|--------|---------|--------|----------|
|                                                                            |        |        |               |        | Day 1   |          | Day 3  |         | Day 7  |          |
| Inferior<br>Colliculus                                                     | 5-HT   |        |               |        |         |          |        |         |        |          |
|                                                                            |        | Male   | 100.00        | ±5.33  | 130.40  | ±6.19**  | 125.10 | ±23.59  | 120.80 | ±6.74*   |
|                                                                            |        | Female | 100.00        | ±30.69 | 176.80  | ±16.63*  | 186.70 | ±11.64* | 109.80 | ±7.33    |
|                                                                            | 5-HIAA |        |               |        |         |          |        |         |        |          |
|                                                                            |        | Male   | 100.00        | ±5.85  | 98.23   | ±6.83    | 118.60 | ±9.20   | 133.80 | ±21.28   |
|                                                                            |        | Female | 100.00        | ±8.98  | 131.70  | ±9.10    | 118.80 | ±5.17   | 109.20 | ±4.85    |
| Thalamus                                                                   | NE     |        |               |        |         |          |        |         |        |          |
|                                                                            |        | Male   | 100.00        | ±3.98  | 72.48   | ±4.457** | 53.75  | ±22.61  | 66.19  | ±17.5    |
|                                                                            |        | Female | 100.00        | ±8.35  | 110.10  | ±9.99    | 93.34  | ±5.00   | 105.60 | ±4.93    |
|                                                                            | 5-HT   |        |               |        |         |          |        |         |        |          |
|                                                                            |        | Male   | 100.00        | ±57.75 | 399.10  | ±65.91*  | 208.00 | ±130.60 | 298.10 | ±101.20  |
|                                                                            |        | Female | 100.00        | ±17.67 | 93.36   | ±6.69    | 42.90  | ±2.36*  | 82.55  | ±22.35   |
| Cortex                                                                     | 5-HIAA |        |               |        |         |          |        |         |        |          |
|                                                                            |        | Male   | 100.00        | ±4.61  | 108.30  | ±6.521   | 103.40 | ±23.83  | 121.80 | ±22.77   |
|                                                                            |        | Female | 100.00        | ±19.20 | 63.65   | ±11.93   | 47.77  | ±13.99  | 53.51  | ±16.55   |
|                                                                            | NE     |        |               |        |         |          |        |         |        |          |
|                                                                            |        | Male   | 100.00        | ±4.45  | 89.03   | ±10.32   | 121.50 | ±34.36  | 195.80 | ±16.25** |
|                                                                            |        | Female | 100.00        | ±37.63 | 128.90  | ±31.32   | 73.43  | ±30.14  | 243.90 | ±101.30  |
| Striatum                                                                   | 5-HT   |        |               |        |         |          |        |         |        |          |
|                                                                            |        | Male   | 100.00        | ±9.14  | 190.20  | ±78.88   | 56.76  | ±20.12  | 61.23  | ±4.63*   |
|                                                                            |        | Female | 100.00        | ±4.02  | 114.10  | ±2.91    | 91.69  | ±2.93   | 94.86  | ±6.66    |
|                                                                            | 5-HIAA |        |               |        |         |          |        |         |        |          |
|                                                                            |        | Male   | 100.00        | ±3.32  | 153.90  | ±44.84   | 79.85  | ±26.7   | 85.94  | ±6.70    |
|                                                                            |        | Female | 100.00        | ±22.92 | 161.40  | ±32.19   | 33.97  | ±15.87* | 7.85   | ±0.62**  |
| Striatum                                                                   | NE     |        |               |        |         |          |        |         |        |          |
|                                                                            |        | Male   | 100.00        | ±7.64  | 83.91   | ±17.35   | 88.99  | ±21.79  | 113.70 | ±9.78    |
|                                                                            | Female | 100.00 | ±68.55        | 361.40 | ±67.30* | 145.10   | ±13.22 | 75.93   | ±24.57 |          |
